# Supplementary material
Source: Research Square preprint supplement (doi:10.21203/rs.3.rs-10108537/v1)
Supplement: Supplementary file 1 [file 7fbae805ac63affe2d5c2b66.pdf]

|                                                                                                                                                                                                                      |                  |               |
|----------------------------------------------------------------------------------------------------------------------------------------------------------------------------------------------------------------------|------------------|---------------|
|  <p><b>KEMENTERIAN AGAMA</b><br/><b>UIN JAKARTA</b><br/><b>FITK</b><br/><i>Jl. Ir. H. Juanda No. 95 Ciputat 15412 Indonesia</i></p> | <b>FORM (FR)</b> | No. Dokumen : |
|                                                                                                                                                                                                                      |                  | Tgl. Terbit : |
|                                                                                                                                                                                                                      |                  | No. Revisi :  |
| <b>RESEARCH INSTRUMENT</b>                                                                                                                                                                                           |                  |               |

The research instrument was developed in Bahasa Indonesia to ensure clarity and suitability for primary school students

Title

**The Influence of Social Emotional Learning (SEL)-Based Classroom Management Strategies on Student Self-Regulation and Altruistic Behavior at MIN Kota Tangerang Selatan**

Researcher : Siti Masyithoh

**A. Petunjuk Pengisian**

1. Lembar validasi ini bertujuan untuk menilai kelayakan instrumen angket siswa dalam mengukur variabel penelitian berdasarkan kesesuaian indikator, kejelasan bahasa, dan keterukuran butir pernyataan.
2. Bapak/Ibu dimohon untuk memberikan tanda centang (✓) pada kolom penilaian yang sesuai dengan pendapat Bapak/Ibu dengan skala penilaian sebagai berikut :

|      |               |
|------|---------------|
| Skor | Keterangan    |
| 1    | Tidak sesuai  |
| 2    | Kurang sesuai |
| 3    | Sesuai        |
| 4    | Sangat Sesuai |

3. Atas bantuan dan kesediaan Bapak/Ibu dalam mengisi lembar validasi ini, saya ucapkan Terima kasih.

**1. Instrumen *Social Emotional Learning (SEL)***

| No. | Pernyataan                                                 | 1 | 2 | 3 | 4 |
|-----|------------------------------------------------------------|---|---|---|---|
| 1.  | Guru menanyakan perasaan saya sebelum pembelajaran dimulai |   |   |   |   |
| 2.  | Guru memberi kesempatan saya untuk mengungkapkan perasaan  |   |   |   |   |
| 3.  | Guru menunjukkan sikap peduli kepada saya saat di kelas    |   |   |   |   |

|     |                                                                                             |  |  |  |  |
|-----|---------------------------------------------------------------------------------------------|--|--|--|--|
| 4.  | Guru mengajak saya melakukan latihan pernapasan atau relaksasi (misalnya bernapas perlahan) |  |  |  |  |
| 5.  | Guru membantu saya menenangkan diri saat merasa tidak nyaman                                |  |  |  |  |
| 6.  | Guru membimbing saya agar lebih tenang sebelum belajar                                      |  |  |  |  |
| 7.  | Guru mengajarkan pentingnya menghargai perasaan teman                                       |  |  |  |  |
| 8.  | Guru membiarkan siswa mengejek teman di kelas                                               |  |  |  |  |
| 9.  | Guru memberi contoh sikap empati kepada siswa                                               |  |  |  |  |
| 10. | Guru membentuk kerja kelompok dalam pembelajaran                                            |  |  |  |  |
| 11. | Guru membimbing saya untuk bekerja sama dengan teman                                        |  |  |  |  |
| 12. | Guru jarang memperhatikan komunikasi antar siswa                                            |  |  |  |  |
| 13. | Guru memberikan pujian atas perilaku baik                                                   |  |  |  |  |
| 14. | Guru memberikan motivasi dengan kata-kata positif                                           |  |  |  |  |
| 15. | Guru membiasakan saya untuk bertanggung jawab atas perilaku saya                            |  |  |  |  |

## 2. Instrumen Regulasi Diri Siswa

| No. | Pernyataan                                                   | 1 | 2 | 3 | 4 |
|-----|--------------------------------------------------------------|---|---|---|---|
| 1.  | Saya dapat menenangkan diri saat mengalami kesulitan belajar |   |   |   |   |
| 2.  | Saya mudah marah saat belajar                                |   |   |   |   |
| 3.  | Saya mampu mengendalikan emosi saat pembelajaran             |   |   |   |   |
| 4.  | Saya mematuhi aturan kelas tanpa diingatkan                  |   |   |   |   |
| 5.  | Saya sering mengganggu teman saat belajar                    |   |   |   |   |
| 6.  | Saya mengerjakan tugas dengan disiplin                       |   |   |   |   |
| 7.  | Saya fokus saat guru menjelaskan pelajaran                   |   |   |   |   |
| 8.  | Saya mudah terganggu saat belajar                            |   |   |   |   |
| 9.  | Saya dapat kembali fokus setelah terganggu                   |   |   |   |   |
| 10. | Saya menyadari tugas yang harus saya selesaikan              |   |   |   |   |
| 11. | Saya memeriksa kembali pekerjaan saya                        |   |   |   |   |

|     |                                                          |  |  |  |  |
|-----|----------------------------------------------------------|--|--|--|--|
| 12. | Saya menyadari kesalahan saya saat belajar               |  |  |  |  |
| 13. | Saya tetap berusaha meskipun mengalami kesulitan belajar |  |  |  |  |
| 14. | Saya mudah menyerah dalam mengerjakan tugas              |  |  |  |  |
| 15. | Saya mencoba kembali setelah gagal                       |  |  |  |  |

### 3. Altruistic Behavior

| No. | Pernyataan                                                                       | 1 | 2 | 3 | 4 |
|-----|----------------------------------------------------------------------------------|---|---|---|---|
| 1.  | Saya membantu teman yang kesulitan belajar                                       |   |   |   |   |
| 2.  | Saya menolong teman yang sakit atau terluka                                      |   |   |   |   |
| 3.  | Saya merasa sedih ketika melihat teman saya sedih                                |   |   |   |   |
| 4.  | Saya berusaha menghibur teman yang kecewa                                        |   |   |   |   |
| 5.  | Saya mau berbagi dengan teman                                                    |   |   |   |   |
| 6.  | Saya tidak mau meminjamkan barang kepada teman                                   |   |   |   |   |
| 7.  | Saya membantu teman tanpa mengharapkan balasan                                   |   |   |   |   |
| 8.  | Saya ingin dipuji saat membantu teman                                            |   |   |   |   |
| 9.  | Saya ikut menjaga kebersihan kelas                                               |   |   |   |   |
| 10. | Saya mengingatkan teman dengan cara yang baik                                    |   |   |   |   |
| 11. | Saya mau membantu teman meskipun bukan teman dekat                               |   |   |   |   |
| 12. | Saya takut membantu teman dalam situasi sulit                                    |   |   |   |   |
| 13. | Saya mau membantu teman meskipun tidak disuruh.                                  |   |   |   |   |
| 14. | Saya tidak peduli saat teman mengalami kesulitan                                 |   |   |   |   |
| 15. | Saya tetap berbuat baik kepada teman meskipun ada teman yang tidak menyukai saya |   |   |   |   |

Researcher

Dr. Siti Masyithoh, M.Pd.
