# Supplementary material
Source: Research Square preprint supplement (doi:10.21203/rs.3.rs-10108537/v1)
Supplement: Supplementary file 2 [file e924aa9df21ce7438738cb77.pdf]

## MANOVA\_RESULTS\_SEL\_STUDY

### Between-Subjects Factors

|     | Value | Label   | N  |
|-----|-------|---------|----|
| SEL | 1.00  | SEL     | 50 |
|     | 2.00  | Non SEL | 50 |

### Descriptive Statistics

|                     | SEL     | Mean    | Std. Deviation | N   |
|---------------------|---------|---------|----------------|-----|
| Self Regulation     | SEL     | 52.0000 | 4.46757        | 50  |
|                     | Non SEL | 44.1600 | 2.75799        | 50  |
|                     | Total   | 48.0800 | 5.40049        | 100 |
| Altruistic Behavior | SEL     | 52.9200 | 4.85227        | 50  |
|                     | Non SEL | 47.4400 | 3.87646        | 50  |
|                     | Total   | 50.1800 | 5.16472        | 100 |

### Box's Test of Equality of Covariance Matrices<sup>a</sup>

|         |        |
|---------|--------|
| Box's M | 14.202 |
|---------|--------|

|      |             |
|------|-------------|
| F    | 4.629       |
| df1  | 3           |
| df2  | 1728720.000 |
| Sig. | .003        |

Tests the null hypothesis that the observed covariance matrices of the dependent variables are equal across groups.

a. Design: Intercept + SEL

### Multivariate Tests<sup>a</sup>

| Effect    |                    | Value   | F                     | Hypothesis df | Error df | Sig. | Partial Eta Squared | Noncent. Parameter | Observed Power <sup>c</sup> |
|-----------|--------------------|---------|-----------------------|---------------|----------|------|---------------------|--------------------|-----------------------------|
| Intercept | Pillai's Trace     | .995    | 9082.562 <sup>b</sup> | 2.000         | 97.000   | .000 | .995                | 18165.124          | 1.000                       |
|           | Wilks' Lambda      | .005    | 9082.562 <sup>b</sup> | 2.000         | 97.000   | .000 | .995                | 18165.124          | 1.000                       |
|           | Hotelling's Trace  | 187.269 | 9082.562 <sup>b</sup> | 2.000         | 97.000   | .000 | .995                | 18165.124          | 1.000                       |
|           | Roy's Largest Root | 187.269 | 9082.562 <sup>b</sup> | 2.000         | 97.000   | .000 | .995                | 18165.124          | 1.000                       |
| SEL       | Pillai's Trace     | .534    | 55.494 <sup>b</sup>   | 2.000         | 97.000   | .000 | .534                | 110.988            | 1.000                       |
|           | Wilks' Lambda      | .466    | 55.494 <sup>b</sup>   | 2.000         | 97.000   | .000 | .534                | 110.988            | 1.000                       |
|           | Hotelling's Trace  | 1.144   | 55.494 <sup>b</sup>   | 2.000         | 97.000   | .000 | .534                | 110.988            | 1.000                       |

|                    |       |                     |       |        |      |      |         |       |
|--------------------|-------|---------------------|-------|--------|------|------|---------|-------|
| Roy's Largest Root | 1.144 | 55.494 <sup>b</sup> | 2.000 | 97.000 | .000 | .534 | 110.988 | 1.000 |
|--------------------|-------|---------------------|-------|--------|------|------|---------|-------|

a. Design: Intercept + SEL

b. Exact statistic

c. Computed using alpha = ,05

### Tests of Between-Subjects Effects

| Source          | Dependent Variable  | Type III Sum of Squares | df  | Mean Square | F         | Sig. | Partial Eta Squared | Noncent. Parameter | Observed Power <sup>c</sup> |
|-----------------|---------------------|-------------------------|-----|-------------|-----------|------|---------------------|--------------------|-----------------------------|
| Corrected Model | Self Regulation     | 1536.640 <sup>a</sup>   | 1   | 1536.640    | 111.489   | .000 | .532                | 111.489            | 1.000                       |
|                 | Altruistic Behavior | 750.760 <sup>b</sup>    | 1   | 750.760     | 38.928    | .000 | .284                | 38.928             | 1.000                       |
| Intercept       | Self Regulation     | 231168.640              | 1   | 231168.640  | 16772.186 | .000 | .994                | 16772.186          | 1.000                       |
|                 | Altruistic Behavior | 251803.240              | 1   | 251803.240  | 13056.464 | .000 | .993                | 13056.464          | 1.000                       |
| SEL             | Self Regulation     | 1536.640                | 1   | 1536.640    | 111.489   | .000 | .532                | 111.489            | 1.000                       |
|                 | Altruistic Behavior | 750.760                 | 1   | 750.760     | 38.928    | .000 | .284                | 38.928             | 1.000                       |
| Error           | Self Regulation     | 1350.720                | 98  | 13.783      |           |      |                     |                    |                             |
|                 | Altruistic Behavior | 1890.000                | 98  | 19.286      |           |      |                     |                    |                             |
| Total           | Self Regulation     | 234056.000              | 100 |             |           |      |                     |                    |                             |
|                 | Altruistic Behavior | 254444.000              | 100 |             |           |      |                     |                    |                             |
| Corrected Total | Self Regulation     | 2887.360                | 99  |             |           |      |                     |                    |                             |

|                     |          |    |  |  |  |  |  |  |
|---------------------|----------|----|--|--|--|--|--|--|
| Altruistic Behavior | 2640.760 | 99 |  |  |  |  |  |  |
|---------------------|----------|----|--|--|--|--|--|--|

a. R Squared = .532 (Adjusted R Squared = .527)

b. R Squared = .284 (Adjusted R Squared = .277)

c. Computed using alpha = ,05

### Estimated Marginal Means

#### SEL

#### Estimates

| Dependent Variable  | SEL     | Mean   | Std. Error | 95% Confidence Interval |             |
|---------------------|---------|--------|------------|-------------------------|-------------|
|                     |         |        |            | Lower Bound             | Upper Bound |
| Self Regulation     | SEL     | 52.000 | .525       | 50.958                  | 53.042      |
|                     | Non SEL | 44.160 | .525       | 43.118                  | 45.202      |
| Altruistic Behavior | SEL     | 52.920 | .621       | 51.688                  | 54.152      |
|                     | Non SEL | 47.440 | .621       | 46.208                  | 48.672      |

#### Pairwise Comparisons

| Dependent Variable  | (I) SEL | (J) SEL | Mean Difference (I-J) | Std. Error | Sig. <sup>b</sup> | 95% Confidence Interval for Difference <sup>b</sup> |             |
|---------------------|---------|---------|-----------------------|------------|-------------------|-----------------------------------------------------|-------------|
|                     |         |         |                       |            |                   | Lower Bound                                         | Upper Bound |
| Self Regulation     | SEL     | Non SEL | 7.840*                | .743       | .000              | 6.367                                               | 9.313       |
|                     | Non SEL | SEL     | -7.840*               | .743       | .000              | -9.313                                              | -6.367      |
| Altruistic Behavior | SEL     | Non SEL | 5.480*                | .878       | .000              | 3.737                                               | 7.223       |
|                     | Non SEL | SEL     | -5.480*               | .878       | .000              | -7.223                                              | -3.737      |

Based on estimated marginal means

\*. The mean difference is significant at the ,05 level.

b. Adjustment for multiple comparisons: Bonferroni.

### Multivariate Tests

|                    | Value | F                   | Hypothesis df | Error df | Sig. | Partial Eta Squared | Noncent. Parameter | Observed Power <sup>b</sup> |
|--------------------|-------|---------------------|---------------|----------|------|---------------------|--------------------|-----------------------------|
| Pillai's trace     | .534  | 55.494 <sup>a</sup> | 2.000         | 97.000   | .000 | .534                | 110.988            | 1.000                       |
| Wilks' lambda      | .466  | 55.494 <sup>a</sup> | 2.000         | 97.000   | .000 | .534                | 110.988            | 1.000                       |
| Hotelling's trace  | 1.144 | 55.494 <sup>a</sup> | 2.000         | 97.000   | .000 | .534                | 110.988            | 1.000                       |
| Roy's largest root | 1.144 | 55.494 <sup>a</sup> | 2.000         | 97.000   | .000 | .534                | 110.988            | 1.000                       |

Each F tests the multivariate effect of SEL. These tests are based on the linearly independent pairwise comparisons among the estimated marginal means.

a. Exact statistic

b. Computed using alpha = ,05

### Univariate Tests

| Dependent Variable  |          | Sum of Squares | df | Mean Square | F       | Sig. | Partial Eta Squared | Noncent. Parameter | Observed Power <sup>a</sup> |
|---------------------|----------|----------------|----|-------------|---------|------|---------------------|--------------------|-----------------------------|
| Self Regulation     | Contrast | 1536.640       | 1  | 1536.640    | 111.489 | .000 | .532                | 111.489            | 1.000                       |
|                     | Error    | 1350.720       | 98 | 13.783      |         |      |                     |                    |                             |
| Altruistic Behavior | Contrast | 750.760        | 1  | 750.760     | 38.928  | .000 | .284                | 38.928             | 1.000                       |
|                     | Error    | 1890.000       | 98 | 19.286      |         |      |                     |                    |                             |

The F tests the effect of SEL. This test is based on the linearly independent pairwise comparisons among the estimated marginal means.

a. Computed using alpha = ,05
